# Supplementary material for: Light fueled mixing in open surface droplet microfluidics for rapid probe preparation
Source: Royal Society of Chemistry journal article supplement (doi:10.1039/d1cp03714e), 2021-01-01
Supplement: d1cp03714e3.pdf [file d1cp03714e3.pdf]

## Supplementary Information for

### Light fueled mixing in open surface droplet microfluidics for rapid probe preparation

Dongliang Li <sup>a,b</sup>, Rong Chen <sup>a,b\*</sup>, Xun Zhu <sup>a,b</sup>, Dingding Ye <sup>a,b</sup>, Yang Yang <sup>a,b</sup>, Wei Li  
<sup>a,b</sup>, Haonan Li <sup>a,b</sup>, Yijing Yang <sup>a,b</sup>, Qiang Liao <sup>a,b</sup>

<sup>a</sup> Key Laboratory of Low-grade Energy Utilization Technologies and Systems (Chongqing University), Ministry of Education, Chongqing 400030, China

<sup>b</sup> Institute of Engineering Thermophysics, School of Energy and Power Engineering, Chongqing University, Chongqing 400030, China

\* Corresponding author.

Tel.: 0086-23-65102019; fax: 0086-23-65102474; e-mail: [rchen@cqu.edu.cn](mailto:rchen@cqu.edu.cn) (Rong Chen)

### Contents

- **Fig. S1** UV-Vis-IR absorption spectra of pure water and dynabeads-contained solution in a wavelength range of 200-2000 nm.
- **Fig. S2** Variation in surface tension of dynabeads-contained solution with temperature.
- **Table 1** Values of parameters

■ Fig. S1

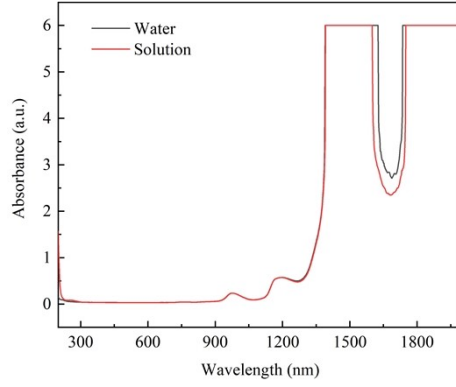

Fig. S1 UV-Vis-IR absorbance spectra of pure water and dynabeads-contained solution in a wavelength range of 200-2000 nm.

■ Fig. S2

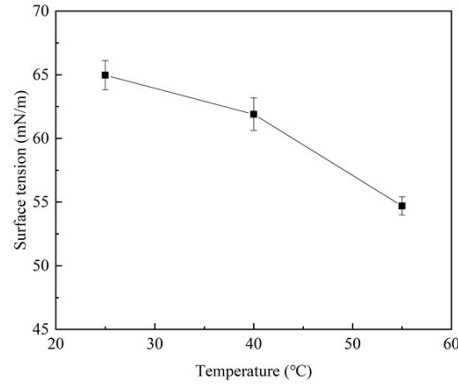

Fig. S2 Variation in surface tension of dynabeads-contained solution with temperature.

■ Table 1

Table 1 Values of parameters

| Parameter                                  | Symbol                                        | Value                                                    |
|--------------------------------------------|-----------------------------------------------|----------------------------------------------------------|
| density                                    | $\rho$                                        | 1058.44 kg·m <sup>-3</sup>                               |
| acceleration of gravity                    | $g$                                           | 9.8 m·s <sup>-2</sup>                                    |
| thermal expansion coefficient              | $\beta$                                       | 4×10 <sup>-4</sup> K <sup>-1</sup>                       |
| characteristic length                      | $L$                                           | 1.44×10 <sup>-3</sup> m                                  |
| temperature difference                     | $\Delta T_{max}$                              | 32 K                                                     |
| thermal diffusivity                        | $\alpha$                                      | 1.44×10 <sup>-7</sup> m <sup>2</sup> ·s <sup>-1</sup>    |
| kinematic viscosity                        | $\nu$                                         | 5.67×10 <sup>-6</sup> m <sup>2</sup> ·s <sup>-1</sup>    |
| temperature coefficient of surface tension | $\gamma$                                      | 3.42×10 <sup>-4</sup> N·m <sup>-1</sup> ·K <sup>-1</sup> |
| $Ra$ number                                | $Ra_{max} = g\beta L^3 \Delta T / \alpha \nu$ | 459                                                      |
| $Ma$ number                                | $Ma = \gamma L \Delta T / \alpha \rho \nu$    | 18236                                                    |
| Ratio of $Ra$ to $Ma$                      | $\chi_{max} = Ra / Ma$                        | 0.025                                                    |
